# Supplementary material
Source: Springer Nature journal article supplement (https://www.springermedizin.de/resource/supplementary/12967_2014_1861_MOESM13_ESM.pdf/9574974)

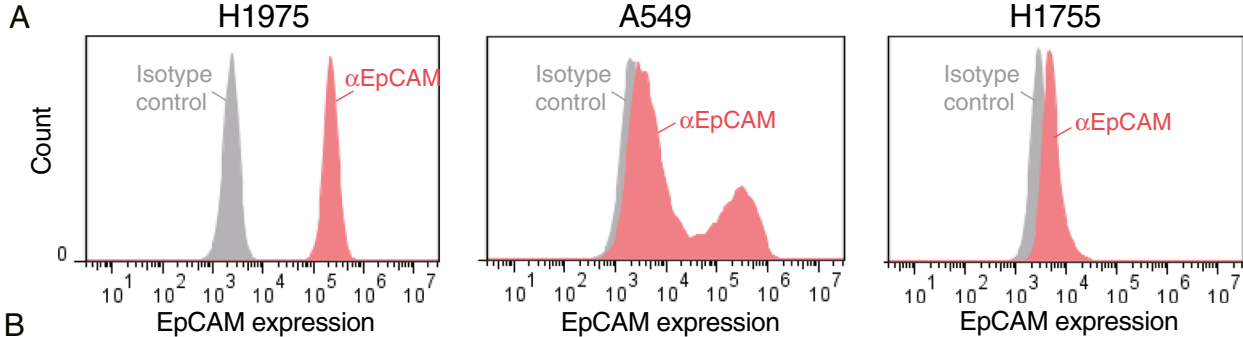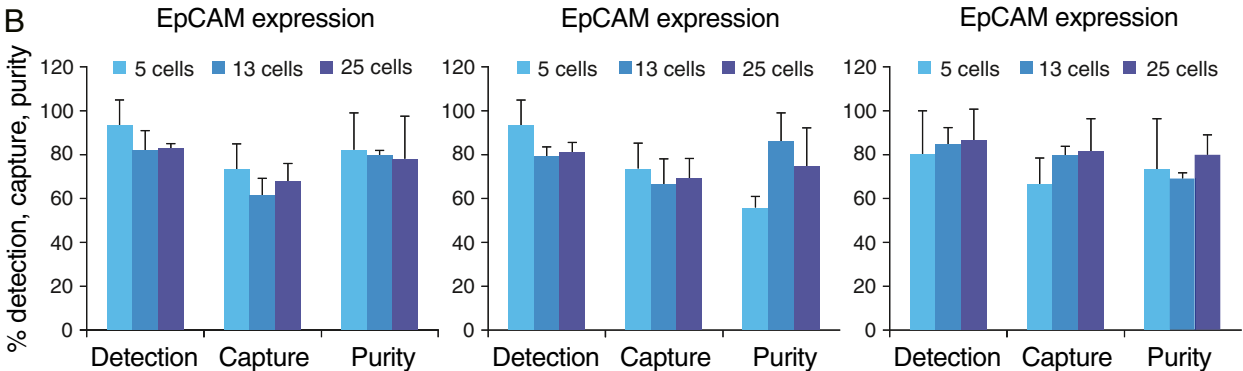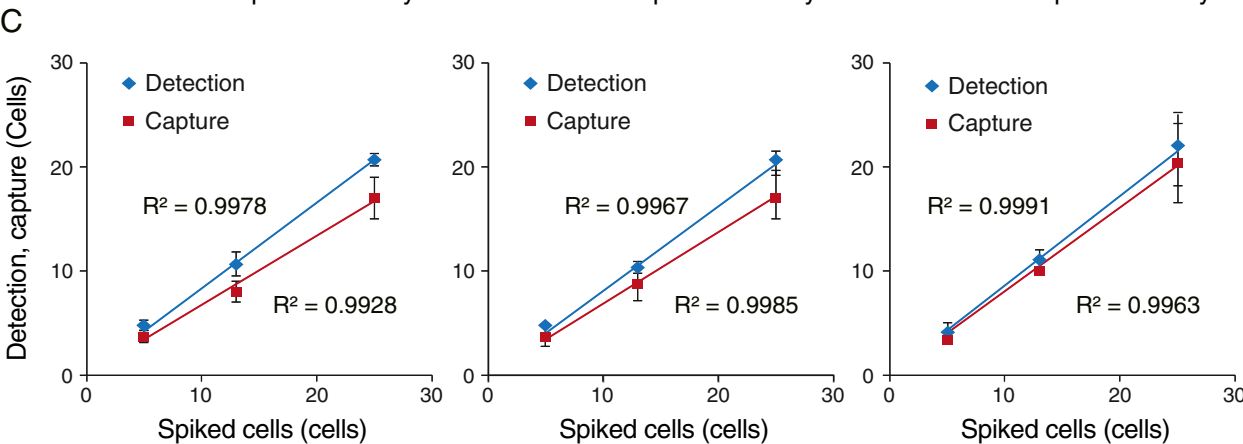

Supplement: MOESM13 [file 9574974]
